# Supplementary material for: Early Prediction of Alzheimer’s Disease Using Null Longitudinal Model-Based Classifiers
Source: PubMed Central journal article supplement (PMC5207395; doi:10.1371/journal.pone.0168011), 2017-01-03
Supplement: pone.0168011.s004.pdf [file pone.0168011.s004.pdf]

**S3 Fig. CSF- $A\beta$  vs. CSF- $\tau$  concentration available at last subjects' observations.**

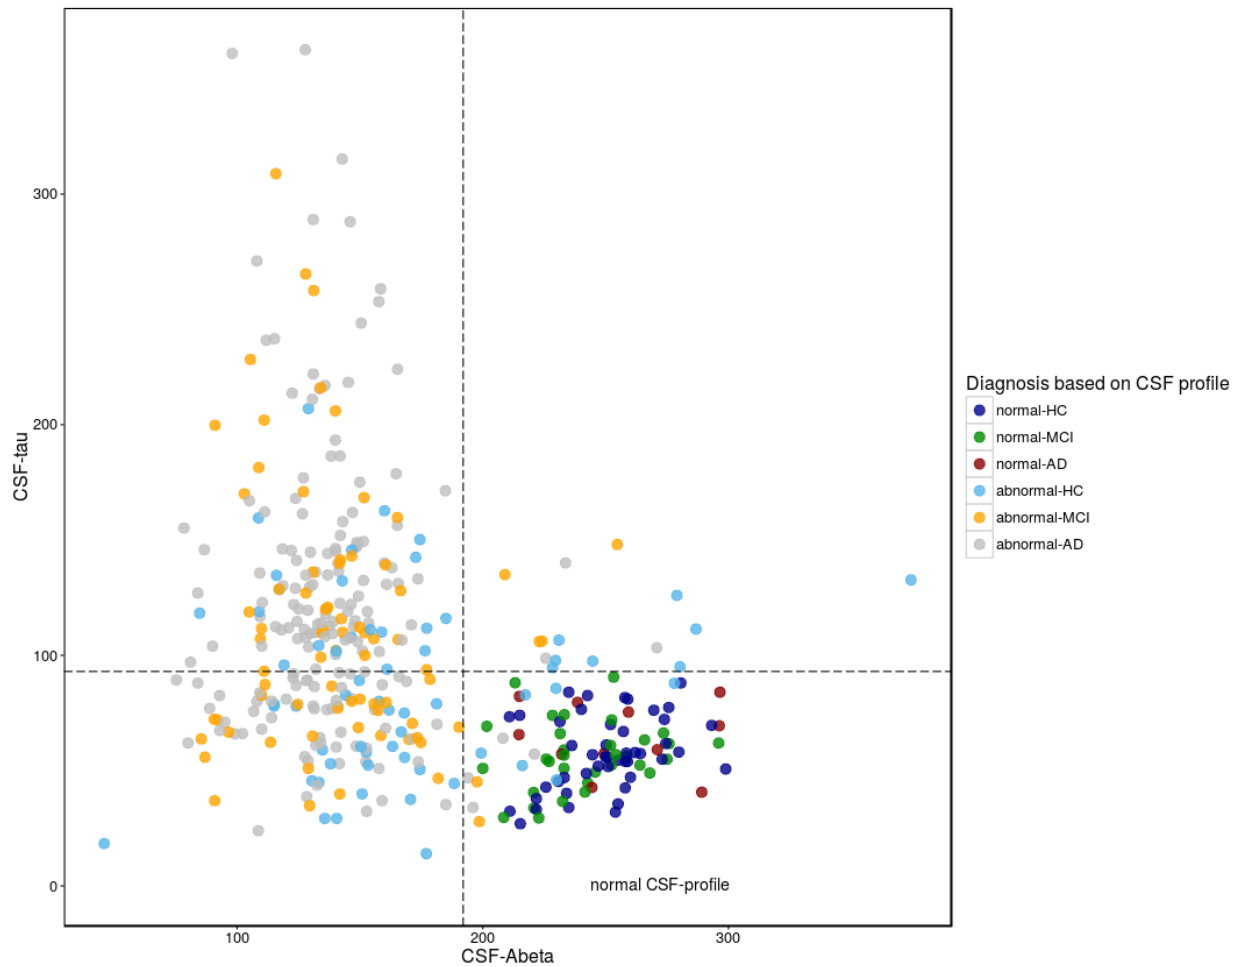

**Fig 3. CSF- $A\beta$  vs. CSF- $\tau$  concentration available at last subject" observations.**

Dots represent the last CSF biomarker measured for subjects available at April, 2015. Vertical and horizontal dashed lines split normal CSF-profile from abnormal profile. Null models for characterization of healthy brain structures were built from samples labelled with blue dots.
