# Supplementary material for: Early Prediction of Alzheimer’s Disease Using Null Longitudinal Model-Based Classifiers
Source: PubMed Central journal article supplement (PMC5207395; doi:10.1371/journal.pone.0168011), 2017-01-03
Supplement: pone.0168011.s005.pdf [file pone.0168011.s005.pdf]

S4 Fig. Boxplot of trajectory of left hippocampal volume for normal- $HC_{csf}$  subjects.

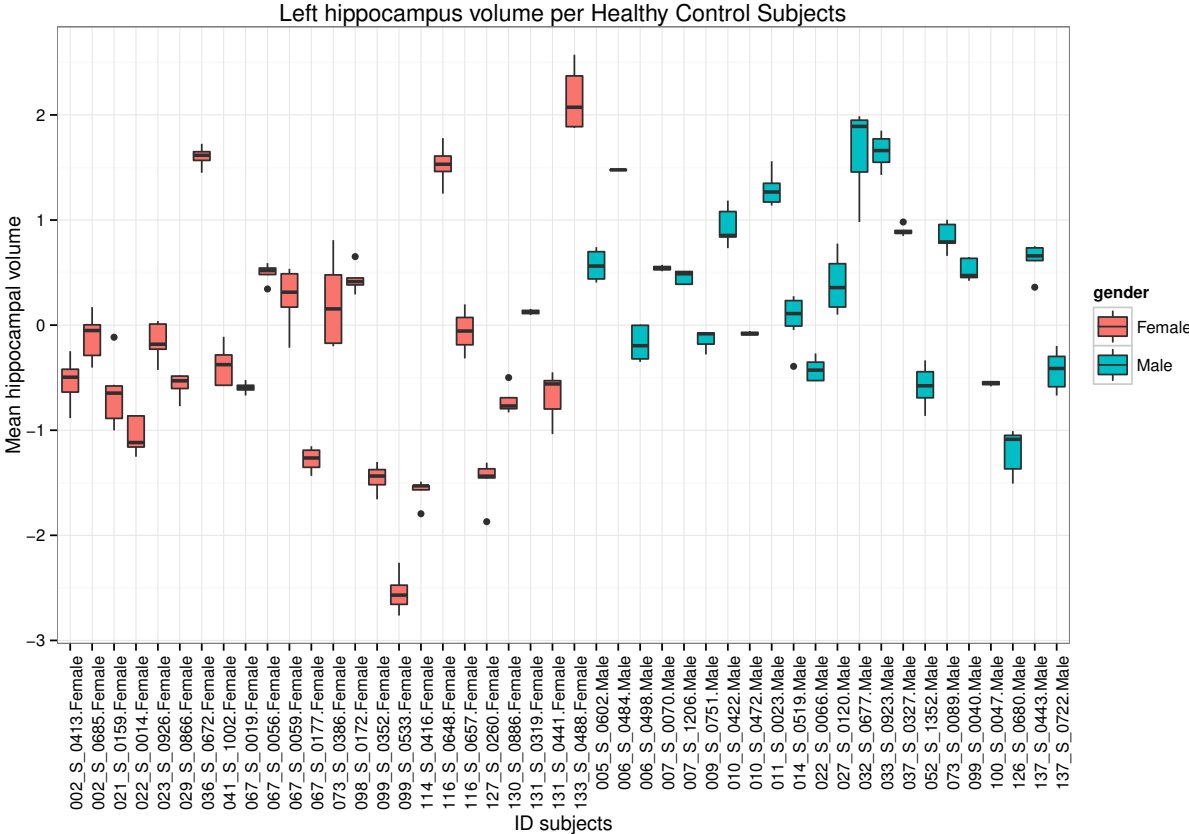

Fig 4. Boxplot of trajectory of left hippocampal volume for normal- $HC_{csf}$  subjects.

High between-subject variability is evident, e.g., by comparing subject 099\_S\_0533 with subject 133\_S\_0488. Likewise, there is a strong indication of gender effect over hippocampal volume, female volumes are less than the man ones. Note that we standardized every MRI-based biomarker to have zero mean and unit variance.
