# Supplementary material for: Early Prediction of Alzheimer’s Disease Using Null Longitudinal Model-Based Classifiers
Source: PubMed Central journal article supplement (PMC5207395; doi:10.1371/journal.pone.0168011), 2017-01-03
Supplement: pone.0168011.s006.pdf [file pone.0168011.s006.pdf]

## S5 Fig. Examples of variant and quasi-variant ROIs for normal-HC<sub>csf</sub> subjects stratified by gender.

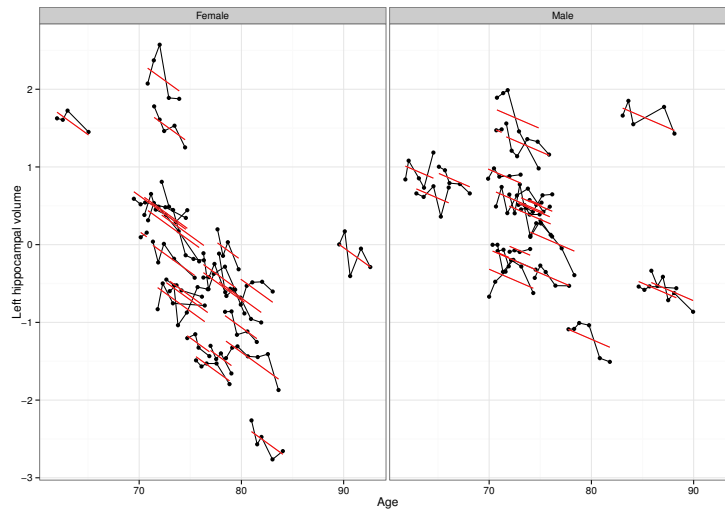

(a)

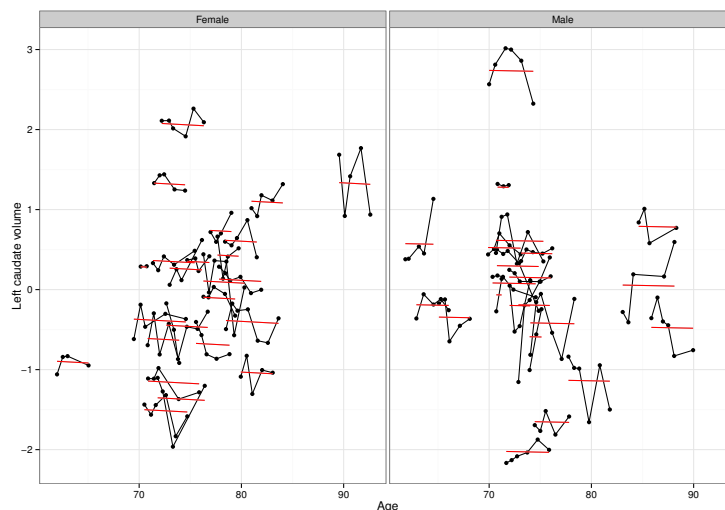

(b)

**Fig 5. Examples of variant and quasi-variant ROIs per normal-HC<sub>csf</sub> subjects stratified by gender.**

(a) Left hippocampal volume classified as variant (*vr*) ROI; where the slope of trajectories is not close to zero. (b) Left caudate volume classified as quasi-variant (*qvr*) ROI; where the slope of trajectories is close to zero. Note that for both regions, the y-intercept values vary between subjects, but the slope value of each ROI is the same for all subjects.
