# Supplementary material for: Early Prediction of Alzheimer’s Disease Using Null Longitudinal Model-Based Classifiers
Source: PubMed Central journal article supplement (PMC5207395; doi:10.1371/journal.pone.0168011), 2017-01-03
Supplement: pone.0168011.s008.pdf [file pone.0168011.s008.pdf]

# S1 Table. Statistical descriptors of studied ADNI cohort at baseline.

Table 1. Statistical descriptors of studied ADNI cohort at baseline.

|                             | Female         |                   | Male           |                   |
|-----------------------------|----------------|-------------------|----------------|-------------------|
|                             | <i>N</i> = 316 |                   | <i>N</i> = 431 |                   |
| Age <sub>bl</sub>           | 71.1           | 75.3              | 79.9           | 71.2              |
|                             | (74.8 ± 6.8)   |                   | (75.4 ± 6.7)   |                   |
| Years of education          | 0.65           | 0.75              | 0.85           | 0.70              |
|                             | (0.75 ± 0.14)  |                   | (0.80 ± 0.15)  |                   |
| Ethnicity                   |                |                   |                |                   |
| Hisp/Latino                 | 2.2%           | $\frac{7}{316}$   | 1.9%           | $\frac{8}{431}$   |
| Not Hisp/Latino             | 96.5%          | $\frac{305}{316}$ | 98.1%          | $\frac{423}{431}$ |
| Unknown                     | 1.3%           | $\frac{4}{316}$   | 0.0%           | $\frac{0}{431}$   |
| Race                        |                |                   |                |                   |
| Am Indian/Alaskan           | 0.32%          | $\frac{1}{316}$   | 0.00%          | $\frac{0}{431}$   |
| Asian                       | 1.58%          | $\frac{5}{316}$   | 2.09%          | $\frac{9}{431}$   |
| Black                       | 6.33%          | $\frac{20}{316}$  | 3.25%          | $\frac{14}{431}$  |
| More than one               | 0.32%          | $\frac{1}{316}$   | 0.23%          | $\frac{1}{431}$   |
| White                       | 91.46%         | $\frac{289}{316}$ | 94.43%         | $\frac{407}{431}$ |
| Marital State               |                |                   |                |                   |
| Divorced                    | 10.44%         | $\frac{33}{316}$  | 3.25%          | $\frac{14}{431}$  |
| Married                     | 61.08%         | $\frac{193}{316}$ | 89.10%         | $\frac{384}{431}$ |
| Never married               | 4.43%          | $\frac{14}{316}$  | 2.09%          | $\frac{9}{431}$   |
| Unknown                     | 0.00%          | $\frac{0}{316}$   | 0.23%          | $\frac{1}{431}$   |
| Widowed                     | 24.05%         | $\frac{76}{316}$  | 5.34%          | $\frac{23}{431}$  |
| APOE-ε4 *                   |                |                   |                |                   |
| 0                           | 52%            | $\frac{164}{316}$ | 50%            | $\frac{215}{431}$ |
| 1                           | 37%            | $\frac{116}{316}$ | 39%            | $\frac{167}{431}$ |
| 2                           | 11%            | $\frac{36}{316}$  | 11%            | $\frac{49}{431}$  |
| MMSE                        | 25.0           | 27.0              | 29.0           | 25.0              |
|                             | (26.8 ± 2.7)   |                   | (26.8 ± 2.5)   |                   |
| CDRGLOBAL                   |                |                   |                |                   |
| 0                           | 32.6%          | $\frac{103}{316}$ | 26.0%          | $\frac{112}{431}$ |
| 0.5                         | 54.4%          | $\frac{172}{316}$ | 65.7%          | $\frac{283}{431}$ |
| 1                           | 13.0%          | $\frac{41}{316}$  | 8.3%           | $\frac{36}{431}$  |
| <i>dx</i> <sub>bl</sub>     |                |                   |                |                   |
| AD                          | 25%            | $\frac{80}{316}$  | 20%            | $\frac{86}{431}$  |
| CN                          | 33%            | $\frac{103}{316}$ | 26%            | $\frac{112}{431}$ |
| LMCI                        | 42%            | $\frac{133}{316}$ | 54%            | $\frac{233}{431}$ |
| Availability of CSF data ** |                |                   |                |                   |
| Yes                         | 52%            | $\frac{164}{316}$ | 55%            | $\frac{236}{431}$ |
| Not                         | 48%            | $\frac{152}{316}$ | 45%            | $\frac{195}{431}$ |

*a b c* represent the lower quartile *a*, the median *b*, and the upper quartile *c* for continuous variables.  $x \pm s$  represents  $\bar{X} \pm 1$  SD. *N* is the number of non-missing values observations. Numbers after percents are frequencies. AD: dementia due to Alzheimer's Disease; CN: Control Normal and LMCI: Late Mild Cognitive Impairment.

\* Number of copies of allele.

\*\* Availability of both CSF-Aβ and CSF-τ was data at time of study (April, 2015).
