# Supplementary material for: Early Prediction of Alzheimer’s Disease Using Null Longitudinal Model-Based Classifiers
Source: PubMed Central journal article supplement (PMC5207395; doi:10.1371/journal.pone.0168011), 2017-01-03
Supplement: pone.0168011.s009.pdf [file pone.0168011.s009.pdf]

## S2 Table. Statistical descriptors of males used to build the SVM.

**Table 2.** Statistical descriptors of males used to build the SVM.

|                             | N    | 55-59                              | 60-64                              | 65-69                              | 70-74                              | 75-79                              | 80-85                              | 85-89                              | 90+                                |
|-----------------------------|------|------------------------------------|------------------------------------|------------------------------------|------------------------------------|------------------------------------|------------------------------------|------------------------------------|------------------------------------|
|                             |      | $N = 23$                           | $N = 86$                           | $N = 152$                          | $N = 459$                          | $N = 554$                          | $N = 420$                          | $N = 209$                          | $N = 5$                            |
| age                         | 1908 | 57.71 58.67 59.37<br>(58.46± 1.19) | 62.38 63.47 64.28<br>(63.19± 1.32) | 66.26 67.90 69.17<br>(67.73± 1.56) | 71.81 73.03 74.02<br>(72.88± 1.35) | 76.28 77.41 78.60<br>(77.44± 1.41) | 80.95 82.18 83.61<br>(82.29± 1.49) | 85.83 86.78 87.82<br>(86.94± 1.33) | 90.21 90.35 90.61<br>(90.40± 0.26) |
| dx <sub>csf</sub>           | 1003 |                                    |                                    |                                    |                                    |                                    |                                    |                                    |                                    |
| normal-MCI <sub>csf</sub>   |      | 25.0% $\frac{-3}{12}$              | 30.9% $\frac{13}{42}$              | 14.3% $\frac{12}{84}$              | 9.4% $\frac{21}{224}$              | 4.1% $\frac{13}{315}$              | 10.2% $\frac{21}{205}$             | 17.2% $\frac{20}{116}$             | 0.0% $\frac{-0}{5}$                |
| normal-AD <sub>csf</sub>    |      | 0.0% $\frac{0}{12}$                | 0.0% $\frac{0}{42}$                | 0.0% $\frac{0}{84}$                | 4.9% $\frac{11}{224}$              | 3.2% $\frac{10}{315}$              | 3.4% $\frac{7}{205}$               | 5.2% $\frac{5}{116}$               | 0.0% $\frac{-0}{5}$                |
| abnormal-HC <sub>csf</sub>  |      | 0.0% $\frac{0}{12}$                | 9.5% $\frac{4}{42}$                | 7.1% $\frac{6}{84}$                | 21.9% $\frac{49}{224}$             | 22.9% $\frac{72}{315}$             | 11.7% $\frac{24}{205}$             | 14.7% $\frac{17}{116}$             | 40.0% $\frac{-2}{5}$               |
| abnormal-MCI <sub>csf</sub> |      | 0.0% $\frac{0}{12}$                | 2.4% $\frac{1}{42}$                | 23.8% $\frac{20}{84}$              | 21.0% $\frac{47}{224}$             | 30.8% $\frac{97}{315}$             | 24.4% $\frac{50}{205}$             | 19.0% $\frac{22}{116}$             | 0.0% $\frac{-0}{5}$                |
| abnormal-AD <sub>csf</sub>  |      | 75.0% $\frac{9}{12}$               | 57.1% $\frac{24}{42}$              | 54.8% $\frac{46}{84}$              | 42.9% $\frac{96}{224}$             | 39.0% $\frac{123}{315}$            | 50.2% $\frac{103}{205}$            | 44.0% $\frac{51}{116}$             | 60.0% $\frac{-3}{5}$               |
| dx <sub>last</sub>          | 1908 |                                    |                                    |                                    |                                    |                                    |                                    |                                    |                                    |
| AD                          |      | 60.9% $\frac{14}{23}$              | 43.0% $\frac{37}{86}$              | 59.2% $\frac{30}{152}$             | 44.9% $\frac{206}{459}$            | 39.9% $\frac{221}{554}$            | 46.2% $\frac{194}{420}$            | 41.6% $\frac{87}{209}$             | 60.0% $\frac{-3}{5}$               |
| HC                          |      | 4.3% $\frac{-1}{23}$               | 12.8% $\frac{11}{86}$              | 9.2% $\frac{14}{152}$              | 27.2% $\frac{125}{459}$            | 29.8% $\frac{165}{554}$            | 16.2% $\frac{68}{420}$             | 20.1% $\frac{42}{209}$             | 40.0% $\frac{-2}{5}$               |
| MCI                         |      | 34.8% $\frac{8}{23}$               | 44.2% $\frac{38}{86}$              | 31.6% $\frac{48}{152}$             | 27.9% $\frac{128}{459}$            | 30.3% $\frac{168}{554}$            | 37.6% $\frac{158}{420}$            | 38.3% $\frac{80}{209}$             | 0.0% $\frac{-0}{5}$                |
| dx <sub>age</sub>           | 1908 |                                    |                                    |                                    |                                    |                                    |                                    |                                    |                                    |
| AD                          |      | 30.4% $\frac{7}{23}$               | 33.7% $\frac{29}{86}$              | 34.9% $\frac{53}{152}$             | 24.6% $\frac{113}{459}$            | 26.9% $\frac{149}{554}$            | 29.1% $\frac{122}{420}$            | 27.3% $\frac{57}{209}$             | 60.0% $\frac{-3}{5}$               |
| HC                          |      | 4.3% $\frac{-1}{23}$               | 11.6% $\frac{10}{86}$              | 9.2% $\frac{14}{152}$              | 27.2% $\frac{125}{459}$            | 30.9% $\frac{171}{554}$            | 19.3% $\frac{81}{420}$             | 21.5% $\frac{45}{209}$             | 40.0% $\frac{-2}{5}$               |
| MCI                         |      | 65.2% $\frac{15}{23}$              | 54.6% $\frac{47}{86}$              | 55.9% $\frac{85}{152}$             | 48.1% $\frac{221}{459}$            | 42.2% $\frac{234}{554}$            | 51.7% $\frac{217}{420}$            | 51.2% $\frac{107}{209}$            | 0.0% $\frac{-0}{5}$                |
| APOE-ε4                     | 1908 |                                    |                                    |                                    |                                    |                                    |                                    |                                    |                                    |
| 0                           |      | 69.6% $\frac{16}{23}$              | 54.6% $\frac{47}{86}$              | 28.3% $\frac{43}{152}$             | 47.7% $\frac{219}{459}$            | 48.6% $\frac{269}{554}$            | 53.1% $\frac{223}{420}$            | 56.9% $\frac{119}{209}$            | 40.0% $\frac{-2}{5}$               |
| 1                           |      | 13.0% $\frac{-3}{23}$              | 38.4% $\frac{33}{86}$              | 44.1% $\frac{67}{152}$             | 37.7% $\frac{173}{459}$            | 41.2% $\frac{228}{554}$            | 40.0% $\frac{168}{420}$            | 38.8% $\frac{81}{209}$             | 40.0% $\frac{-2}{5}$               |
| 2                           |      | 17.4% $\frac{4}{23}$               | 7.0% $\frac{6}{86}$                | 27.6% $\frac{42}{152}$             | 14.6% $\frac{67}{459}$             | 10.3% $\frac{57}{554}$             | 6.9% $\frac{29}{420}$              | 4.3% $\frac{9}{209}$               | 20.0% $\frac{-1}{5}$               |
| MMSE                        | 1906 | 25.0 26.0 28.5<br>(26.7± 2.3)      | 24.0 27.0 29.0<br>(26.0± 3.5)      | 23.0 26.0 29.0<br>(25.4± 4.2)      | 25.0 27.0 29.0<br>(26.4± 3.7)      | 25.0 28.0 29.0<br>(26.3± 3.9)      | 24.0 27.0 29.0<br>(26.2± 3.6)      | 24.0 27.0 28.0<br>(25.8± 3.4)      | 26.0 27.0 27.0<br>(25.2± 4.7)      |
| CDRGLOBAL                   | 1899 | 1.8 2.5 3.2<br>(2.7±1.3)           | 0.5 1.2 4.0<br>(2.2±2.0)           | 1.0 2.0 4.0<br>(2.6±2.2)           | 0.0 1.5 3.0<br>(2.1±2.2)           | 0.0 1.5 3.5<br>(2.3±2.6)           | 0.5 1.5 3.5<br>(2.3±2.3)           | 1.0 2.0 3.5<br>(2.7±2.9)           | 0.0 4.0 5.5<br>(3.7±3.8)           |

$a$   $b$   $c$  represent the lower quartile  $a$ , the median  $b$ , and the upper quartile  $c$  for continuous variables.  $x \pm s$  represents  $\bar{X} \pm 1$  SD. N: number of samples available at each age group, it being possible to have more of one observation per subject.
