# Supplementary material for: Early Prediction of Alzheimer’s Disease Using Null Longitudinal Model-Based Classifiers
Source: PubMed Central journal article supplement (PMC5207395; doi:10.1371/journal.pone.0168011), 2017-01-03
Supplement: pone.0168011.s010.pdf [file pone.0168011.s010.pdf]

# S3 Table. Statistical descriptors of females used to build the SVM.

**Table 3.** Statistical descriptors of females used to build the SVM

|                             | N    | 55-59                         | 60-64                         | 65-69                         | 70-74                         | 75-79                         | 80-85                         | 85-89                         | 90+                           |
|-----------------------------|------|-------------------------------|-------------------------------|-------------------------------|-------------------------------|-------------------------------|-------------------------------|-------------------------------|-------------------------------|
|                             |      | $N = 37$                      | $N = 62$                      | $N = 117$                     | $N = 338$                     | $N = 355$                     | $N = 287$                     | $N = 101$                     | $N = 5$                       |
| age                         | 1302 | 56.6 57.5 58.5<br>(57.6± 1.3) | 61.5 62.6 64.0<br>(62.6± 1.4) | 66.4 68.0 69.2<br>(67.8± 1.5) | 71.6 72.8 73.9<br>(72.7± 1.4) | 76.3 77.5 78.6<br>(77.5± 1.4) | 81.0 82.2 83.5<br>(82.3± 1.4) | 85.6 86.5 87.4<br>(86.6± 1.2) | 90.9 91.4 92.8<br>(91.6± 1.2) |
| dx <sub>csf</sub>           | 640  |                               |                               |                               |                               |                               |                               |                               |                               |
| normal-MCI <sub>csf</sub>   |      | 0.0% $\frac{0}{29}$           | 29.7% $\frac{11}{37}$         | 16.0% $\frac{12}{75}$         | 3.0% $\frac{5}{167}$          | 2.5% $\frac{4}{161}$          | 12.1% $\frac{16}{132}$        | 10.5% $\frac{4}{38}$          | 0.0% $\frac{0}{1}$            |
| normal-AD <sub>csf</sub>    |      | 0.0% $\frac{0}{29}$           | 0.0% $\frac{0}{37}$           | 0.0% $\frac{0}{75}$           | 0.0% $\frac{0}{167}$          | 2.5% $\frac{4}{161}$          | 3.8% $\frac{5}{132}$          | 15.8% $\frac{6}{38}$          | 100.0% $\frac{1}{1}$          |
| abnormal-HC <sub>csf</sub>  |      | 0.0% $\frac{0}{29}$           | 0.0% $\frac{0}{37}$           | 1.3% $\frac{1}{75}$           | 22.8% $\frac{38}{167}$        | 33.5% $\frac{54}{161}$        | 25.0% $\frac{33}{132}$        | 26.3% $\frac{10}{38}$         | 0.0% $\frac{0}{1}$            |
| abnormal-MCI <sub>csf</sub> |      | 17.2% $\frac{5}{29}$          | 54.0% $\frac{20}{37}$         | 21.3% $\frac{16}{75}$         | 21.6% $\frac{36}{167}$        | 18.6% $\frac{30}{161}$        | 17.4% $\frac{23}{132}$        | 0.0% $\frac{0}{38}$           | 0.0% $\frac{0}{1}$            |
| abnormal-AD <sub>csf</sub>  |      | 82.8% $\frac{24}{29}$         | 16.2% $\frac{6}{37}$          | 61.3% $\frac{46}{75}$         | 52.7% $\frac{88}{167}$        | 42.9% $\frac{69}{161}$        | 41.7% $\frac{55}{132}$        | 47.4% $\frac{18}{38}$         | 0.0% $\frac{0}{1}$            |
| dx <sub>last</sub>          | 1302 |                               |                               |                               |                               |                               |                               |                               |                               |
| AD                          |      | 81.1% $\frac{30}{37}$         | 27.4% $\frac{17}{62}$         | 64.1% $\frac{75}{117}$        | 49.1% $\frac{166}{338}$       | 38.0% $\frac{135}{355}$       | 45.6% $\frac{131}{287}$       | 51.5% $\frac{52}{101}$        | 80.0% $\frac{4}{5}$           |
| HC                          |      | 0.0% $\frac{0}{37}$           | 0.0% $\frac{0}{62}$           | 5.1% $\frac{6}{117}$          | 30.8% $\frac{104}{338}$       | 34.1% $\frac{121}{355}$       | 24.7% $\frac{71}{287}$        | 28.7% $\frac{29}{101}$        | 20.0% $\frac{1}{5}$           |
| MCI                         |      | 18.9% $\frac{7}{37}$          | 72.6% $\frac{45}{62}$         | 30.8% $\frac{36}{117}$        | 20.1% $\frac{68}{338}$        | 27.9% $\frac{99}{355}$        | 29.6% $\frac{85}{287}$        | 19.8% $\frac{20}{101}$        | 0.0% $\frac{0}{5}$            |
| dx <sub>age</sub>           | 1302 |                               |                               |                               |                               |                               |                               |                               |                               |
| AD                          |      | 62.16% $\frac{23}{37}$        | 17.74% $\frac{11}{62}$        | 35.90% $\frac{42}{117}$       | 36.39% $\frac{123}{338}$      | 27.04% $\frac{96}{355}$       | 29.97% $\frac{86}{287}$       | 44.55% $\frac{45}{101}$       | 80.00% $\frac{4}{5}$          |
| HC                          |      | 0.00% $\frac{0}{37}$          | 0.00% $\frac{0}{62}$          | 4.27% $\frac{5}{117}$         | 33.14% $\frac{112}{338}$      | 38.87% $\frac{138}{355}$      | 28.22% $\frac{81}{287}$       | 29.70% $\frac{30}{101}$       | 20.00% $\frac{1}{5}$          |
| MCI                         |      | 37.84% $\frac{14}{37}$        | 82.26% $\frac{51}{62}$        | 59.83% $\frac{70}{117}$       | 30.47% $\frac{103}{338}$      | 34.08% $\frac{121}{355}$      | 41.81% $\frac{120}{287}$      | 24.75% $\frac{25}{101}$       | 0.00% $\frac{0}{5}$           |
| NL to Dementia              |      | 0.00% $\frac{0}{37}$          | 0.00% $\frac{0}{62}$          | 0.00% $\frac{0}{117}$         | 0.00% $\frac{0}{338}$         | 0.00% $\frac{0}{355}$         | 0.00% $\frac{0}{287}$         | 0.99% $\frac{1}{101}$         | 0.00% $\frac{0}{5}$           |
| APOE-ε4                     | 1302 |                               |                               |                               |                               |                               |                               |                               |                               |
| 0                           |      | 59.5% $\frac{22}{37}$         | 43.5% $\frac{27}{62}$         | 17.1% $\frac{20}{117}$        | 35.8% $\frac{121}{338}$       | 51.0% $\frac{181}{355}$       | 62.0% $\frac{178}{287}$       | 81.2% $\frac{82}{101}$        | 100.0% $\frac{5}{5}$          |
| 1                           |      | 13.5% $\frac{5}{37}$          | 38.7% $\frac{24}{62}$         | 35.9% $\frac{42}{117}$        | 49.7% $\frac{168}{338}$       | 43.9% $\frac{156}{355}$       | 34.8% $\frac{100}{287}$       | 15.8% $\frac{16}{101}$        | 0.0% $\frac{0}{5}$            |
| 2                           |      | 27.0% $\frac{10}{37}$         | 17.7% $\frac{11}{62}$         | 47.0% $\frac{55}{117}$        | 14.5% $\frac{49}{338}$        | 5.1% $\frac{18}{355}$         | 3.1% $\frac{9}{287}$          | 3.0% $\frac{3}{101}$          | 0.0% $\frac{0}{5}$            |
| MMSE                        | 1297 | 20.0 23.0 25.0<br>(22.2± 4.6) | 25.2 28.0 28.0<br>(26.5± 3.5) | 24.0 26.0 28.0<br>(25.8± 3.0) | 24.0 27.0 29.0<br>(25.6± 4.8) | 24.0 28.0 29.0<br>(26.2± 4.5) | 23.5 27.0 29.0<br>(26.1± 3.5) | 21.0 26.0 29.0<br>(24.9± 4.3) | 24.0 25.5 26.8<br>(25.2± 3.3) |
| CDRGLOBAL                   | 1289 | 3.0 4.0 6.0<br>(4.7±2.6)      | 1.0 1.5 2.0<br>(1.9±1.9)      | 1.5 2.0 3.5<br>(2.6±2.0)      | 0.0 2.0 4.0<br>(2.4±2.5)      | 0.0 1.0 3.5<br>(2.1±2.7)      | 0.5 1.5 4.0<br>(2.4±2.5)      | 0.0 3.0 5.8<br>(3.7±3.6)      | 2.8 4.2 6.0<br>(4.5±2.5)      |

$a$   $b$   $c$  represent the lower quartile  $a$ , the median  $b$ , and the upper quartile  $c$  for continuous variables.  $x \pm s$  represents  $\bar{X} \pm 1$  SD. N: number of samples available at each age group, it being possible to have more of one observation per subject.
