# Supplementary material for: Early Prediction of Alzheimer’s Disease Using Null Longitudinal Model-Based Classifiers
Source: PubMed Central journal article supplement (PMC5207395; doi:10.1371/journal.pone.0168011), 2017-01-03
Supplement: pone.0168011.s011.pdf [file pone.0168011.s011.pdf]

## S4 Table. Performances of classification for current diagnostic.

Table 4. Performances of classification for current diagnostic.

|         | Experiment | Features | ACC  | SEN  | SPE  |
|---------|------------|----------|------|------|------|
| Females | AD vs HC   | $F_1$    | 91.7 | 92.8 | 90.0 |
|         |            | $F_2$    | 94.1 | 95.2 | 92.5 |
|         | MCI vs HC  | $F_1$    | 79.5 | 92.9 | 52.9 |
|         |            | $F_2$    | 85.7 | 93.6 | 70.0 |
|         | AD vs MCI  | $F_1$    | 66.8 | 57.3 | 74.3 |
|         |            | $F_2$    | 81.6 | 80.9 | 82.1 |
| Males   | AD vs HC   | $F_1$    | 87.1 | 89.0 | 84.2 |
|         |            | $F_2$    | 94.1 | 97.7 | 88.4 |
|         | MCI vs HC  | $F_1$    | 75.5 | 97.3 | 10.0 |
|         |            | $F_2$    | 82.5 | 93.5 | 49.7 |
|         | AD vs MCI  | $F_1$    | 72.3 | 68.4 | 75.7 |
|         |            | $F_2$    | 73.8 | 64.7 | 81.3 |

$F_1$  is the features set integrated with the MRI-based biomarkers and age;  $F_2$  is integrated with the MRI-based biomarkers, age, MMSE (Mini-Mental Examination Score) and CDRGLOBAL (Clinical dementia rating global scale).
