# Supplementary material for: Early Prediction of Alzheimer’s Disease Using Null Longitudinal Model-Based Classifiers
Source: PubMed Central journal article supplement (PMC5207395; doi:10.1371/journal.pone.0168011), 2017-01-03
Supplement: pone.0168011.s012.pdf [file pone.0168011.s012.pdf]

## S5 Table. Performances of classification for last known diagnostic.

Table 5. Performances of classification for last known diagnostic.

|         | Experiment | Features | ACC  | SEN  | SPE  |
|---------|------------|----------|------|------|------|
| Females | AD vs HC   | $F_1$    | 86.6 | 90.7 | 77.7 |
|         |            | $F_2$    | 91.7 | 92.9 | 89.2 |
|         | MCI vs HC  | $F_1$    | 70.0 | 70.0 | 70.0 |
|         |            | $F_2$    | 77.1 | 75.3 | 79.2 |
|         | AD vs MCI  | $F_1$    | 69.8 | 86.5 | 45.0 |
|         |            | $F_2$    | 72.5 | 87.4 | 50.4 |
| Males   | AD vs HC   | $F_1$    | 85.6 | 94.8 | 64.4 |
|         |            | $F_2$    | 90.0 | 96.8 | 74.4 |
|         | MCI vs HC  | $F_1$    | 62.9 | 83.5 | 29.4 |
|         |            | $F_2$    | 77.6 | 85.0 | 65.6 |
|         | AD vs MCI  | $F_1$    | 65.4 | 85.0 | 54.0 |
|         |            | $F_2$    | 69.0 | 85.1 | 5.9  |

$F_1$  is the features set integrated with the MRI-based biomarkers and age;  $F_2$  is integrated with the MRI-based biomarkers, age, MMSE (Mini-Mental Examination Score) and CDRGLOBAL (Clinical dementia rating global scale).
